# Supplementary material
Source: bioRxiv or medRxiv preprint supplement (https://medrxiv.org/highwire/filestream/94584/field_highwire_adjunct_files/0/2020.08.24.20180653-1.pdf)
Supplement: Supplementary file [file 2020.08.24.20180653-1.pdf]

## Supplementary material A: Variable definitions

### Age

*Age at time of surgery, in years*

### Height

*In metres, to calculate BMI*

### Weight

*In kg, to calculate BMI*

### Gender

Male;

Female;

Not specified

### Operation Type description

Elective;

Emergency;

Not specified

### Bilateral status

Unilateral;

Simultaneous;

Sequential

### Diagnosis

*Primary diagnosis related to procedure*

Osteoarthritis;

Rheumatoid Arthritis;

Psoriatic Arthritis;

Septic Arthritis

### Surgery type

primary;

revision

### Surgery Side

Left;

Right

### Joint

Knee;

Hip

### Haemoglobin

g/L

(Recoded to Anaemia yes/no using threshold of <120g/L for females, or <130g/L for males)

**ASA score**

1;  
2;  
3;  
4

**Use of walking aids**

*Use of aids on a routine basis for walking*

Yes; No

**Preoperative gait distance**

*Distance patient can walk unassisted in metres*

**Caregiver assistance at home**

Lives alone no support;

Lives with spouse only;

Lives with family;

Lives alone with supporting family nearby

Other

**Preoperative METs**

≥4

<4

**Opioid use**

Name and dosage; or No

(Converted to binary yes/no)

**Neuropathic pain meds**

*Pt has prescription at time of surgery*

Yes; No

**Simple Analgesics**

Yes; No

**Date of surgery**

Separated 'In OR At' variable from dd mmm yyyy HH:MM:ss AM/PM' into 'Date of surgery' and 'Time of surgery (in)'

Converted the date component to dd-mmm-yyyy

**Time of surgery (out)**

Separated 'Out OR At' variable from dd mmm yyyy HH:MM:ss AM/PM and converted the time component into HH:MM:ss 24 hour time

**Date of discharge**

Separated 'Discharge DateTime' variable from dd mmm yyyy HH:MM:ss AM/PM' into 'Date of discharge' and 'Time of discharge'

Converted the date component into dd-mmm-yyyy

**Time of discharge**

Converted from HH:MM:ss AM/PM into HH:MM:ss 24hour time.

**Length of Stay**

Date and time of surgery to date and time of discharge (in days)

**Discharge destination**

Home;

Home with community support;

Inpatient rehab;

Slow stream rehab;

Aged care

**Comorbidities:****Cardiovascular**

Yes; No

*Common inclusions: Hypertension; dysrhythmia; valvular disease; congestive heart failure; decreased left ventricular function; peripheral vascular disease; ischaemic heart disease; previous MI; stable angina; unstable angina; stent; coronary artery bypass grafting*

**Cardiovascular (specify)**

*Each cardiovascular comorbidity listed, semicolon delimited for calculation of 'number of cardiovascular comorbidities'*

**Respiratory**

Yes; No

*Common inclusions: recurrent pneumonia; URI; COPD; Asthma; sleep apnea; shortness of breath (on exertion or otherwise)*

**Diabetes**

Yes; No

**Endocrine (other than diabetes)**

Yes; No

*Common inclusions: Thyroid disease; recent corticosteroid use; hypercholesterolemia; dyslipidemia*

**Previous stroke/TIA**

Yes; No

**Neurologic (other than stroke/TIA)**

Yes; No

*Common inclusions: Seizure disorder; neuropathy/myopathy; neoplasm; increased ICP; Alzheimer's; Parkinsons*

**Renal**

Yes; No

*Common inclusions: Renal insufficiency; renal failure; hemodialysis; shunt/fistula; peritoneal dialysis*

**Hepatic**

Yes; No

*Common inclusions: Cirrhosis; NAFLD*

**Gastrointestinal**

Yes; No

*Common inclusions: GERD; Dysphagia*

**Bleeding disorders**

Yes; No

**Hematologic- other**

Yes; No

*Common inclusions: Thromboembolic disease; previous DVT/PE*

**Musculoskeletal (other than index pathology)**

Yes; No

*Common inclusions: Back pain diagnosis; chronic pain; fibromyalgia; ankylosing spondylitis; spina bifida*

**Psychiatric**

Yes; No

*Common inclusions: depression; anxiety; chronic opiate use; ETOH abuse; illicit drug abuse*

**Others**

Specified

*Includes HIV; Hep B; Hep C etc. Also include smoking status if listed.*
